1 **Title**

2

3 **Supramolecular assembly of the *E. coli* Ldcl upon acid stress**

4

5 **Authors**

6 Matthew Jessop\*, Clarissa Liesche\*, Jan Felix\*, Ambroise Desfosses, Megghane Baulard, Virgile  
7 Adam, Angélique Fraudeau, Karine Huard, Grégory Effantin, Jean-Philippe Kleman, Maria Bacia-  
8 Verloop, Dominique Bourgeois, Irina Gutsche#

9

10 <sup>1</sup>Institut de Biologie Structurale, Univ Grenoble Alpes, CEA, CNRS, IBS, 71 Avenue des martyrs, F-  
11 38044 Grenoble, France

12

13 \*: equal contribution, #: corresponding author.

14

15 **Abstract**

16 Pathogenic and commensal bacteria often have to resist the harsh acidity of the host stomach. The  
17 inducible lysine decarboxylase Ldcl buffers the cytosol and the local extracellular environment to  
18 ensure enterobacterial survival at low pH. Here, we investigate the acid-stress response regulation  
19 of *E. coli* Ldcl by combining biochemical and biophysical characterisation with negative stain and  
20 cryo-electron microscopy, and wide-field and super-resolution fluorescence imaging. Due to  
21 deleterious effects of fluorescent protein fusions on native Ldcl decamers, we opt for three-  
22 dimensional localisation of endogenous wild-type Ldcl in acid-stressed *E. coli* cells, and show that it  
23 organises into patches following an apparent long-range pseudo-helical order. Consistent with  
24 recent hypotheses that *in vivo* clustering of metabolic enzymes often reflects their polymerisation as  
25 a means of stimulus-induced regulation, we show that Ldcl assembles into filaments *in vitro* at low  
26 pH. We solve the structures of these filaments and of the Ldcl decamer formed at neutral pH by  
27 cryo-electron microscopy, and reveal the molecular determinants of Ldcl polymerisation, confirmed  
28 by mutational analysis. Finally, we propose a model for Ldcl function inside the enterobacterial cell,  
29 providing a structural and mechanistic basis for further investigation of the role of its supramolecular  
30 organisation in the acid stress response.

31

32 **Introduction**

33 Cell survival requires the adaptation of metabolism to changing environmental demands.  
34 Biochemical regulation of metabolic enzymes by cellular metabolites has been intensely studied for  
35 many decades. In addition, a growing body of recent light microscopy observations highlights the  
36 spatial regulation of enzymes by stimulus-induced phase separation into distinct loci – liquid droplets,  
37 amyloid-like aggregates or ordered polymers<sup>1</sup>. In eukaryotes, and particularly in yeast, the observed  
38 condensation of fluorescently-labelled metabolic enzymes is triggered by stress, including medium  
39 acidification, hypoxia and nutrient limitation. Enterobacteria such as *Escherichia coli*, *Salmonella* and  
40 *Vibrio* encounter these types of conditions in the host gastrointestinal tract<sup>2</sup>. One of the key  
41 enterobacterial proteins expressed during the acid stress response, upon oxygen limitation and  
42 regulated by the nutrient stress alarmone guanosine tetraphosphate (ppGpp), is the acid stress-

43 inducible lysine decarboxylase LdcI<sup>3-6</sup>. LdcI has been scrutinised since the early 1940s because of  
44 direct links between the efficiency of the acid stress response and pathogenicity<sup>7-9</sup>. This enzyme  
45 transforms lysine into cadaverine while consuming protons and producing CO<sub>2</sub>, thereby contributing  
46 to buffering of the bacterial cytosol and the extracellular medium under acid stress conditions to  
47 promote bacterial survival. While both the structure and the function of LdcI have been thoroughly  
48 studied<sup>6,10</sup>, nothing is known about its localisation inside the bacterial cell.

49 Whereas the overwhelming majority of super-resolution fluorescence imaging is focused on  
50 eukaryotes, optical studies of bacterial systems are nearly exclusively centred on large  
51 macromolecular complexes with obvious superstructure such as cytoskeletal, cell division,  
52 chromosome partitioning, RNA degradation and secretion machineries<sup>11-13</sup>. However, the relevance  
53 of the documented patchy or long-range helical localisation of some of these assemblies is now  
54 questioned and requires re-evaluation. Indeed, the vast majority of these studies were based on  
55 labelling with either fluorescent proteins or epitope tags shown to be able to induce artefactual  
56 associations and localisations<sup>12-15</sup>.

57 A handful of examples of regulation of bacterial metabolic enzymes by phase separation  
58 through stimulus-triggered polymerisation concern well-conserved oligomeric proteins involved in  
59 nucleotide and amino acid metabolism, such as CTP synthase<sup>16,17</sup> and glutamine synthetase<sup>18</sup>.  
60 Interestingly, these enzymes are also able to polymerise into filaments *in vitro*, and their *in vivo*  
61 condensates, detected both in bacteria and in eukaryotes, have been suggested to correspond to  
62 the polymerised state of the enzymes. Other examples of bacterial metabolic enzymes purified as  
63 polymers from bacterial extracts or forming polymers *in vitro* are the aldehyde-alcohol  
64 dehydrogenase AdhE<sup>19</sup> and the hydrogen-dependent CO<sub>2</sub> reductase HDCR<sup>20</sup>.

65 Specific to bacteria, LdcI is a decamer composed of five dimers tightly arranged into  
66 pentameric double-rings (PDB ID: 3N75)<sup>6</sup>. Interestingly, *in vitro*, at pH below 6, these double-rings  
67 were observed by negative stain electron microscopy (ns-EM) to stack on top of one another into  
68 filament-like structures<sup>6,8</sup>. Here, we address the spatial localisation of the *E. coli* LdcI. To critically  
69 evaluate labelling artefacts and define the optimum constructs for subsequent chromosomal  
70 manipulation, we start by overexpressing and purifying different fluorescent protein (FP) fusions of  
71 LdcI, performing their structural and biochemical characterisation *in vitro*, and observing the  
72 distribution of the overexpressed constructs *in vivo*. This methodological section enables us to  
73 propose a workflow that brings together examinations of *in vivo* protein localisations with *in vitro*  
74 biochemical and ns-EM characterisations of the purified FP fusions in order to ensure artefact-free  
75 optical imaging investigations. This analysis is followed by unveiling a supramolecular organisation  
76 of endogenous LdcI inside the *E. coli* cell upon acid stress, coupled to determination of the *in vitro*  
77 structure of the LdcI polymers by cryo-electron microscopy (cryo-EM). For comparison, we also  
78 determined the cryo-EM structure of the LdcI decamer at neutral pH. In addition, mutational analysis  
79 of the LdcI stack-forming interfaces allowed identification of critical residues involved in stack  
80 formation. Finally, we discuss the observed LdcI localisation pattern in the light of the wealth of  
81 available functional and imaging data, and offer a structural and mechanistic basis of supramolecular  
82 LdcI assembly, which will aid in the design of future experiments linking LdcI stack formation to *E.*  
83 *coli* acid stress fitness.

## 85 Results

### 86 Fluorescent protein fusions affect Ldcl structure without modifying localisation of the 87 overexpressed fusion constructs

88 Because of the small size of the *E. coli* cell, we opted for super-resolution microscopy imaging  
89 <sup>>21</sup> and set out to localise Ldcl inside the cell upon acid stress by either Photoactivation  
90 Localisation Microscopy (PALM) or Stochastic Optical Reconstruction Microscopy (STORM)<sup>22–24</sup>. *A*  
91 *priori*, PALM seemed more relevant because this technique relies on genetically-encoded FPs fused  
92 to the protein of interest, and is therefore unmatched in terms of labelling specificity and efficiency.  
93 In addition, PALM does not require delivery of fluorescent molecules across the cell wall, and  
94 enables live cell imaging and single molecule tracking.

95 Considering that Ldcl is an acid stress response enzyme, we opted for either mGeosM<sup>25</sup> or  
96 Dendra2<sub>T69A</sub><sup>26</sup> as FP markers because of their relatively low pKa values, high monomericity and high  
97 fluorescent quantum yields. In the Ldcl decamer structure, the N-termini are oriented inwards and  
98 towards the central pore of the double ring, while the C-termini point to the ring periphery and are  
99 readily accessible from the outside. Therefore, on the one side, one could assume that an N-terminal  
100 labelling with an FP would be likely to interrupt the Ldcl tertiary structure. On the other side, the only  
101 well characterised binding partner of Ldcl, the AAA+ ATPase RavA, is known to interact precisely  
102 with the C-terminal  $\beta$ -sheet of Ldcl<sup>27</sup>. Assembly of two copies of double-pentameric rings of Ldcl and  
103 five copies of hexameric RavA spirals results in a huge 3.3 MDa macromolecular cage of intricate  
104 architecture and largely unknown function<sup>27–29</sup>. The Ldcl-RavA cage is proposed to assist assembly  
105 of specific respiratory complexes in *E. coli* and to counteract acid stress under starvation conditions  
106 by alleviating ppGpp-dependent inhibition of Ldcl<sup>30–32</sup>. Thus, although these functions still require  
107 further investigation, preservation of the RavA-binding propensity should be one of the criteria for  
108 assessing the suitability of an Ldcl-FP fusion. Therefore, both N- and C-terminal fusion constructs  
109 with either mGeosM or Dendra2<sub>T69A</sub> attached to Ldcl via an appropriate linker were cloned into  
110 dedicated plasmids and overexpressed at conditions optimised for Ldcl overproduction (see  
111 Methods for details). Expression of fusion proteins was immediately detected by wide-field  
112 fluorescence imaging that showed a similar distribution for the four fusions (Figure 1A). Each  
113 construct was then purified in order to assess its structural integrity and RavA binding capacity *in*  
114 *vitro*, with a goal of defining the most suitable construct for the subsequent creation of a  
115 corresponding chromosomal fusion.

116 The N-terminal Dendra2<sub>T69A</sub>-Ldcl fusion formed exclusively dimers, confirming the structure-  
117 based prediction that the fluorescent tag at this position would perturb the dimer-dimer interaction  
118 (Figure 1B, Supplementary Figure 1). Admittedly, native Ldcl was shown to dissociate into dimers *in*  
119 *vitro* at pH above approximately 7.5, but in this pH range Ldcl is not supposed to be expressed in  
120 the cell and therefore this dissociation may be irrelevant. Surprisingly, in contrast to Dendra2<sub>T69A</sub>-  
121 Ldcl, mGeosM-Ldcl assembled into regular symmetric non-native higher-order oligomers, with a  
122 dramatically altered quaternary structure (Figure 1B, Supplementary Figure 1). These oligomers  
123 were built of three Ldcl tetramers, bridged together by additional densities. Noteworthy, mEos2, the  
124 fluorescent protein from which mGeosM was derived, crystallises as a tetramer (PDB ID: 3S05) that  
125 can be straightforwardly fitted into the Ldcl-bridging densities (Figure 1B). This illustrates that despite  
126 the fact that mGeosM was designed as a monomeric FP (with the first “m” explicitly standing for

127 monomeric), some residual oligomeric tendency is still maintained. This propensity of mGeosM to  
128 oligomerise when bound to Ldcl may be driven by avidity effects – as Ldcl dimers begin to assemble  
129 into a decamer, the local concentration of mGeosM increases to such a point that oligomerisation  
130 becomes energetically favourable, despite the apparent monomer behaviour of mGeosM in gel  
131 filtration<sup>25</sup>. This is also in line with the known propensity of mEos2, from which mGeosM is derived,  
132 to form tetramers at high concentration<sup>33</sup>. To conclude, both N-terminal fusions induced non-native  
133 assembly of Ldcl, and therefore neither were appropriate for determining the native localisation of  
134 this enzyme in the cell.

135 As expected, C-terminal Ldcl fluorescent fusions formed decamers with protruding densities  
136 that can be attributed to flexibly attached FPs (Figure 1B, Supplementary Figure 1). Nevertheless,  
137 despite the long flexible linker between Ldcl and the FP, these constructs were unable to interact  
138 with RavA as shown by Bio-Layer Interferometry (BLI) binding studies (see Methods and  
139 Supplementary Figure 1 for details). This means that the functionality of these fusions cannot be  
140 considered as entirely retained. Thus, none of the four fusions were suitable for an in-depth imaging  
141 analysis under conditions of native Ldcl expression upon acid stress that we planned to undertake.  
142 Altogether, we demonstrated that structural integrity and unaltered interaction with known partners  
143 are useful read-outs for functional preservation. Based on this result we propose that, when feasible,  
144 purification and structure-function analysis of FP fusions should be performed prior to interpretation  
145 of the protein localisation inferred from observation of FP fusions by optical methods. This workflow  
146 can be used for example in cases where chromosomal manipulation for assessment of intact function  
147 is difficult and/or the phenotype is condition-dependent or unclear, whereas basic *in vitro* biochemical  
148 and ns-EM characterisation are efficiently set up.

## 149 **Immunofluorescence of Ldcl in *E. coli* under acid stress reveals its supramolecular** 150 **organisation**

151 Because none of the FP fusions possessed the properties of native Ldcl, we decided to turn  
152 to STORM imaging of the endogenous enzyme. One of the drawbacks of STORM is the requirement  
153 for exogenous labelling and therefore the fixation and permeabilisation of cells. These procedures  
154 are notoriously known to potentially affect cell morphology, and therefore, when possible, the usage  
155 of live cell imaging with FP fusions (as for example in PALM), or observation of unfixed samples  
156 under cryogenic conditions would be ideal. Moreover, fixation, permeabilisation and specific  
157 exogenous labelling in bacteria present unique challenges because of the complex, often multi-  
158 layered cell wall<sup>34,35</sup>. A significant advantage of STORM however is the possibility of direct imaging  
159 of the wild-type (WT) protein, which should circumvent the dangers associated with FP fusions  
160 described above. The three prerequisites for imaging of WT systems by immuno-based labelling in  
161 general and of Ldcl in particular are (i) availability of an antibody or nanobody (antibody fragment  
162 derived from heavy-chain-only camelid antibody) coupled to an organic fluorescent dye and directed  
163 towards the native protein, (ii) precise knowledge of endogenous expression conditions, (iii)  
164 validation of an efficient permeabilisation and immunolabelling technique that enables the  
165 antibody/nanobody to enter the cell and specifically target the protein of interest without altering the  
166 native organization of the cell ultrastructures.  
167

168 As a first step towards STORM imaging of endogenous LdcI, we probed an anti-LdcI  
169 nanobody, hereafter called anti-LdcI-Nb. The complex between purified *E. coli* LdcI and the  
170 nanobody was purified by size exclusion chromatography (see Methods), and imaged by ns-EM.  
171 The resulting 3D map of the LdcI/anti-LdcI-Nb complex demonstrates binding of anti-LdcI-Nb to each  
172 LdcI monomer in the decamer and reveals the location of the interaction site which is clearly distinct  
173 from the RavA binding site (Figure 2A, Supplementary Figure 2). This nanobody was thus identified  
174 as a suitable labelling agent for LdcI imaging in *E. coli* cells, and labelled with the fluorescent dye  
175 AlexaFluor647 (AF647) or AlexaFluor488 (AF488) (see Methods).

176 Consistently with published data, LdcI expression could be induced by a pH shift experiment  
177 (i.e. transfer of bacteria from pH 7.0 into a pH 4.6 growth medium) in the presence of lysine under  
178 oxygen-limiting conditions (Supplementary Figure 3A). While the WT strain grew well under these  
179 conditions and efficiently buffered the extracellular medium up to pH 6.2 in approximately 1.5 to two  
180 hours (Supplementary Figure 3A) concomitantly with the increase in the level of LdcI expression  
181 (Supplementary Figure 3B, C), the growth and the acid stress response of the  $\Delta/dcl$  mutant strain  
182 were severely impaired (Supplementary Figure 3A). Since the peak of LdcI expression by the wild  
183 type cells was achieved between one and two hours after exposure to acid stress (Supplementary  
184 Figure 3B, C), a time point of 90 minutes was chosen for the subsequent labelling and imaging  
185 experiments. The specificity and performance of anti-LdcI-Nb in immunofluorescence labelling of  
186 permeabilised *E. coli* cells were characterised by flow cytometry and wide-field fluorescence imaging  
187 (Supplementary Figure 3D, E). Both techniques demonstrated that in the absence of LdcI expression  
188 no specific fluorescence is seen, confirming the suitability of anti-LdcI-Nb for immunofluorescence  
189 studies. Thus, the above-mentioned prerequisites for immuno-based imaging of cellular LdcI have  
190 been fulfilled. Noteworthy, the LdcI expression profile highlighted a considerable asset of the usage  
191 of STORM instead of PALM for visualisation of the endogenously expressed LdcI: indeed, the  
192 transient nature of the expression and the necessity of work under oxygen-limiting conditions may  
193 have created difficulties due to the longer maturation time of the FPs under these conditions.

194 Initial characterisation of the cellular distribution of LdcI 90 minutes after exposure of *E. coli*  
195 cells to acid stress was carried out by wide-field fluorescence imaging. Based on these images, it  
196 appeared that natively expressed LdcI did not display a homogeneous cytoplasmic distribution but  
197 rather showed a patchy localisation pattern (Figure 2B). 3D STORM imaging subsequently provided  
198 a more detailed view of this patchy distribution. As shown in Figure 3, Supplementary Figure 4, and  
199 Supplementary Movies 1-5, the labelling density was lower in the centre of the bacterium. This  
200 indicates a propensity for LdcI to cluster near the cell periphery, towards the inner membrane and  
201 the cell poles, rather than being distributed homogeneously through the volume. Recent  
202 investigations argue that, in most cases, *in vivo* clustering of metabolic enzymes corresponds to their  
203 polymerised states, and represents an efficient means of regulation of enzymatic activity and  
204 metabolic homeostasis in response to a stimulus<sup>1</sup>. Thus, structure determination of these polymers  
205 is a crucial step towards the understanding of regulation mechanisms. Using ns-EM, we previously  
206 documented that at low pH and high concentration, LdcI decamers tend to stack<sup>6</sup>. Therefore, the  
207 high local concentration of LdcI, clustered in patches in the *E. coli* cell under acid stress conditions  
208 boosting LdcI expression, is likely to induce enzyme polymerisation via stack formation. Remarkably,  
209 the images convey a visual impression that individual patches tend to be further arranged into bands



210 or helix-like turns, showing a circumferential distribution with a sort of a long-range stripy or pseudo-  
211 helical organisation (Figure 3, Supplementary Figure 4, Supplementary Movies 1-5).

### 212 213 **Structural determinants of Ldcl stack formation revealed by cryo-EM**

214 In order to understand the molecular determinants of Ldcl polymerisation at low pH and to  
215 provide a framework for the analysis of Ldcl function under acid stress, we solved the 3D structures  
216 of the Ldcl decamer at pH 7.0 and of Ldcl stacks at pH 5.7 by cryo-EM (See Methods, Figure 4,  
217 Supplementary Figures 5-6, Supplementary Table 1). The 2.8 Å resolution structure of the Ldcl  
218 decamer at pH 7.0 (Figure 4A) is extremely similar (Supplementary Table 2 & 3) to the Ldcl crystal  
219 structure solved at pH 8.5 in an inhibited ppGpp-bound state<sup>6</sup>. However, contrary to pH 7.0 and even  
220 pH 6.2 where Ldcl is still predominantly decameric<sup>10</sup>, Ldcl forms straight rigid filaments on the cryo-  
221 EM grid at pH 5.7, which corresponds to the pH of maximum Ldcl enzymatic activity (Figure 4B).  
222 The structure of a three-decamer stack was solved to a resolution of 3.3 Å, revealing the structural  
223 details of acid stress-induced Ldcl polymerisation (Figure 4C). Ldcl decamers stack tightly on top of  
224 one other, with negligible rotation between decamers along the stack. Each dimer fits snugly in the  
225 inter-dimer groove of decamers above and below.

226 A comparison of Ldcl decamer structures taken from the Ldcl stack cryo-EM map (at pH 5.7),  
227 the Ldcl decamer cryo-EM map (at pH 7.0) and the crystal structure of decameric Ldcl crystallised  
228 with bound ppGpp at pH 8.5 (PDB ID: 3N75) reveals some remarkable differences between the stack  
229 structure and the two decamer structures (Figure 4D, E, Supplementary Table 2 & 3). While the three  
230 structures do not show any major differences at the monomer level, a structural alignment of an Ldcl  
231 dimer extracted from the Ldcl decamer structures with a dimer extracted from the Ldcl stack structure  
232 uncovers a rigid body-like rotation between monomers around a hinge region located at the  
233 monomer-to-monomer interface (Supplementary Table 2 & 3, Figure 4DE). This rotation results in a  
234 5° tilt when comparing the N-terminal wing-domains in Ldcl dimers, and an overall slightly decreased  
235 diameter of the central cavity inside the stacked Ldcl rings (Figure 4D, E), which may contribute to  
236 the tight packing of each dimer into the grooves of an opposing decamer in the stack.

237 A careful examination of the Ldcl stack structure shows that two major inter-decamer  
238 interfaces situated at a two-fold symmetry axis perpendicular to the stack direction contribute to stack  
239 formation (Figure 5A). In particular, the first interface (Figure 5B) is formed between residues K422,  
240 D460, R468, D470, and E482 situated in the ppGpp-binding domain (amino acids 418-564), and  
241 residues N314, D316, and G352 from the PLP-binding domain (amino acids 184-417). D460 from  
242 one decamer makes an electrostatic interaction with K422' of a neighbouring decamer in the stack.  
243 R468 is sandwiched between D316' and E344' from a neighbouring decamer, and makes  
244 electrostatic interactions through its  $\eta$ 1 and  $\eta$ 2 nitrogen atoms with D316'. In addition, D470 interacts  
245 with the backbone of G352', and E482 forms hydrogen bonds with N314'. The second interface  
246 (Figure 5B) is formed between residue N94 of the wing domain (amino acids 1-130) of one set of  
247 opposing dimers, and a stretch of four residues in the ppGpp-binding domain – T444, E445, S446  
248 and D447 - at the end of helix  $\alpha$ 16 from a second set of opposing dimers. The wing domain residue  
249 N94 makes hydrogen bonds with E445' of an opposing dimer. A second charged residue, D447,  
250 interacts with the backbone of T444', and is held in place by R97 from the wing domain of a  
251 neighbouring dimer in the same decamer.

252 Considering that the Ldcl polymerisation is induced by acid stress, we wondered which  
253 residues in the interface would be sensitive to pH changes. Surprisingly, most of the side chains  
254 involved in the inter-decamer interface are charged arginine (pKa 13), aspartate and glutamate  
255 residues (pKa of 4 and 3 respectively), which do not change protonation state in the pH window  
256 relevant for Ldcl activity (pH 5-7)<sup>36</sup>. Nonetheless, other residues, situated outside the interaction  
257 interfaces, may drive stack formation through pH-dependent interactions that would in turn lead to  
258 the observed inter-monomer rotation and the associated constriction of the Ldcl central cavity,  
259 coupled to the alignment of complementary contacts at interfaces one and two (Figure 4D, E). We  
260 note for example that H694 should be protonated in the Ldcl stack structure at pH 5.7 but  
261 deprotonated in the two ring structures at pH 7.0 and pH 8.5, and that an electrostatic interaction  
262 between H694 and D192 situated in the linker region is present in the stack structure only (Figure  
263 5E).

264 To validate the observed interactions at the inter-decamer interface, and to assess the  
265 individual importance of key residues involved in Ldcl stack formation, we constructed four Ldcl point  
266 mutants (R468E, R97E, H694A and H694N), two double mutants (R97E/R468E and E445A/D447A)  
267 and one triple mutant (E445A/D447A/R468E). The mutants were purified following the protocol for  
268 wild-type Ldcl (see Methods), diluted into a buffer at pH 5.7 and observed by ns-EM (Figure 6,  
269 Supplementary Figure 7). Although the grid preparation procedure for ns-EM yields stacks that are  
270 shorter and more curved and distorted when compared to the cryo-EM data (Figure 4B, Figure 6),  
271 our previous observations of the five paralogous *E. coli* amino acid decarboxylases justify the validity  
272 of this approach for a qualitative comparative analysis<sup>6,36</sup>. Ns-EM images make immediately  
273 apparent that the E445A/D447A double mutant does not have a significantly altered capability of  
274 stack formation at pH 5.7 when compared to WT Ldcl, whereas the single R468E mutation is  
275 sufficient to completely abolish stack formation. The R97E mutant has a moderate destabilising  
276 effect and displays fewer and smaller stacks than the WT Ldcl. Consistently with the major role of  
277 R468 in the Ldcl stack formation, the R97E/R468E double mutant and E445A/D447A/R468E triple  
278 mutant exclusively occur as decamers at low pH. Altogether, these results reveal that R468 is one  
279 of the key determinants of Ldcl stack formation. Finally, similarly to the R97E mutant, a modest  
280 destabilisation of stack formation is observed for the two histidine mutants, H694A and H694N,  
281 favouring our hypothesis that H694 may have an influence on the propensity of Ldcl polymerisation  
282 at low pH (Figure 6, Supplementary Figure 7).

## 283 284 Discussion

285 Our synergistic approach, combining several *in vitro* techniques including biochemical  
286 characterisation of purified fluorescent protein fusions, ns-EM observation of mutants, low resolution  
287 ns-EM reconstruction and high resolution cryo-EM analysis, with *in vivo* flow cytometry, wide-field  
288 and 3D-STORM imaging, provides insights into the supramolecular Ldcl assembly upon acid stress.  
289 This work adds to the very few known examples of regular polymerisation as means of regulation of  
290 enzymes involved in amino acid metabolism in bacteria. The cryo-EM structure of the Ldcl stacks  
291 presented here offers a molecular framework for future investigation of the role of the Ldcl  
292 polymerisation in the acid stress response.

293 The high resolution cryo-EM structures of the stack at pH 5.7 and of the decamer at pH 7.0  
294 complement the previously solved crystal structure of the ppGpp-bound Ldcl decamer. Previous  
295 serendipitous co-crystallisation of Ldcl with the nutrient stress response alarmone ppGpp led to  
296 assessment of the effect of ppGpp on Ldcl activity, and to a proposal that ppGpp would act as an  
297 Ldcl inhibitor that prevents excessive lysine consumption upon nutrient limitation during acid stress<sup>6</sup>.  
298 In addition, a ppGpp-dependent disassembly of the Ldcl stacks had been previously observed but  
299 could not be structurally explained since the ppGpp binding site is situated between two neighbouring  
300 dimers inside the Ldcl ring<sup>6</sup>. Our cryo-EM structures show that one of the residues involved both in  
301 ppGpp binding and in the stack formation is arginine 97 (R97). In the crystal structure of ppGpp-  
302 bound Ldcl, R97 makes a stacking interaction with the guanosine imidazole ring of ppGpp, while in  
303 Ldcl stacks R97 is involved in a key interaction at the second interface (Figure 5D), where it locks  
304 D447 in a conformation allowing interactions between helices  $\alpha$ 16 from opposing Ldcl decamers.  
305 Binding of ppGpp to Ldcl interferes with the R97-D447 interaction, thereby most likely prohibiting  
306 correct positioning of D447 at the tip of helix  $\alpha$ 16, and resulting in a disruption of the second stack  
307 interface, leading to a moderate yet notable stack destabilisation (Figure 6, Supplementary Figure  
308 7). Furthermore, our cryo-EM structure of ppGpp-free Ldcl decamers at neutral pH enables to rule  
309 out the effect of ppGpp on the differences observed between the Ldcl stack structure at pH 5.7 and  
310 the ppGpp-Ldcl crystal structure at pH 8.5. Indeed, despite the absence of ppGpp, R97 is still  
311 oriented towards the ppGpp binding site and away from the inter-decamer interface in the pH 7.0  
312 decamer cryo-EM map (Figure 5D). This suggests that the conformational changes in Ldcl driving  
313 stack formation are mostly driven by low pH and not by the absence of ppGpp, although the D192  
314 and H694 hinge residues are similarly far apart in the pH 8.5 and pH 7.0 structures (Figure 5E). Our  
315 current work provides a solid experimental and structural basis for a future closer evaluation of the  
316 hypothesised role of ppGpp in Ldcl regulation *in vitro* and *in vivo*<sup>6</sup>

317 The clusters of endogenous Ldcl at the bacterial periphery observed by optical imaging would  
318 presumably correspond to Ldcl assembled into stacks. Possible reasons for such assembly may be  
319 to provide an efficient way to locally increase the Ldcl concentration and to enhance its activity. But  
320 why would Ldcl, an apparently highly soluble protein, be driven towards the inner membrane? What  
321 would be the advantage for acid-stressed *E. coli* cells to increase the concentration of Ldcl via stack  
322 formation in these particular peripheral locations? Localisation of proteins to specific sites in the  
323 bacterial membrane was shown to be generally driven by chemical factors such as the phospholipid  
324 composition of the lipid microdomains, and by physical factors such as the degree of local curvature  
325 or the electric potential of the membrane<sup>37</sup>. An attractive hypothesis would be that as an acid stress  
326 response protein performing a proton-consuming enzymatic reaction, Ldcl may be attracted to proton  
327 sinks formed by anionic phospholipids which compartmentalise oxidative phosphorylation  
328 (OXPHOS) complexes for efficient functioning in bacterial respiration and adaptation to  
329 environmental changes. Indeed, OXPHOS complexes were often described to be unevenly  
330 distributed in the membrane in the form of mobile patches<sup>38-42</sup>, providing evidence for highly dynamic  
331 and spatially organised bioenergetic membranes in *E. coli* cells<sup>42</sup>. In addition, certain bacterial  
332 flotillins, which are essential scaffold proteins of the functional membrane microdomains, equivalent  
333 to the lipid rafts of eukaryotic cells, also show a patchy distribution and were shown to interact with  
334 specific OXPHOS complexes<sup>42,43</sup>. In this regard, two different lines of evidence would be interesting



335 to note. First, Ldcl was described to co-purify with a partially assembled Complex I<sup>44</sup>, whereas the  
336 Ldcl-binding partner RavA, as well as ViaA, the second protein expressed from the *ravAviaA* operon  
337 and which also interacts with RavA, were shown to interact with both Complex I and fumarate  
338 reductase<sup>31,32</sup>. Second, the other *E. coli* PLP-dependent lysine decarboxylase LdcC, exercising the  
339 role of cadaverine biosynthesis irrespectively of acid stress<sup>45</sup>, neither binds RavA nor forms  
340 stacks<sup>28,36</sup>, in spite of its 69% of identity with Ldcl. It is interesting to note that in LdcC the key stack-  
341 forming residue R468 has been substituted for an alanine while the interacting D316 has been  
342 preserved.

343 The reason for the arrangement of the Ldcl clusters into stripes or pseudo-helical patterns is  
344 also intriguing. While similar distributions have been documented for bacterial cytoskeletal, cell  
345 division, chromosome partitioning, RNA degradation and secretion machineries, an eventual impact  
346 of labelling on these distributions, demonstrated specifically for the YFP-MreB<sup>46</sup>, warrants caution in  
347 their interpretation<sup>12,14</sup>. Here however, we observed endogenous wild-type Ldcl in cells fixed prior to  
348 their permeabilisation and for Ldcl labelled with anti-Ldcl-Nb, which means that the resulting pattern  
349 is likely real and not an artefact. In addition, examination of some published images of OXPPOS  
350 patches (for example Llorente-Garcia et al., 2014) also seem to hint to a possible pseudo-helical  
351 organisation. Excitingly, anionic phospholipid-specific dyes and fluorescently-labelled antibiotics  
352 specific for nascent peptidoglycan synthesis upon cell elongation were also described to be  
353 distributed on helical or stripe patterns<sup>37,47-50</sup>. It is therefore tempting to imagine that inside the  
354 bacterial cell, Ldcl has a tendency to follow a general path upon polymerisation governed by the  
355 underlying patterns in the cell envelope, which are proposed to follow a global right-handed chiral  
356 order<sup>51</sup>.

357 Finally, from the methodological view, our work convincingly illustrates that different FP fusion  
358 constructs can share the same cellular distribution in spite of a completely different structure,  
359 necessitating caution when inferring intact function from the preservation of the protein localisation  
360 inside the cell. Our findings emphasize the importance of characterising FP fusions using both  
361 biochemical and structural techniques, such as ns-EM, to ensure that the FP tag disrupts neither  
362 structure nor function of the target protein.

## 363 **Methods**

### 364 **Expression constructs**

365 For fluorescence studies, several FP fusion constructs were generated starting from an  
366 available plasmid containing the coding sequence of Ldcl (Uniprot entry P0A9H3), cloned in the  
367 pET22b(+) vector with a C-terminal 6xHis-tag<sup>6</sup>. All constructs were generated using the Gibson  
368 cloning strategy and verified by sequencing analysis. The Gibson assembly was performed using  
369 0,4U T5 exonuclease (NEB M0363S), 2,5U Phusion polymerase (NEB M0530S) and 400U Taq  
370 ligase (NEB M0208L) in 1X ISO buffer (100mM Tris-HCl pH 7,5, 10 mM MgCl<sub>2</sub>, 0.8 mM dNTP mix,  
371 10mM DTT, 50 mg PEG-8000, 1 mM NAD). 7.5 µL of the GIBSON Master Mix was mixed with 2.5  
372 µL DNA, containing circa 100 ng of vector. The mix was incubated for 60 min at 50°C.  
373 Transformations were performed in Top10 competent bacteria (One Shot™ TOP10 Chemically  
374 Competent *E. coli*, Invitrogen C404003) and selected using 100 µg/mL ampicillin or 50 µg/mL  
375 kanamycin sulphate from Euromedex (Ampicillin ref EU0400-D, Kanamycin ref EU0010-D). Agarose  
376

377 Gel purification and DNA plasmid extraction kits were purchased from Macherey-Nagel (NucleoSpin  
378 Plasmid ref 740588-250 and NucleoSpin Gel and PCR Clean-up ref 740609-250).

379 Dendra2<sub>T69A</sub>-Ldcl and mGeosM-Ldcl were both cloned in the pET-TEV vector containing an  
380 N-terminal 6xHis-tag, and a TEV cleavage site between Dendra2<sub>T69A</sub> or mGeosM and the Ldcl gene.  
381 Ldcl-Dendra2<sub>T69A</sub> and Ldcl-mGeosM were both cloned in the pET22b(+) vector with Ldcl followed by  
382 either Dendra2<sub>T69A</sub> or mGeosM containing an uncleavable C-terminal 6XHis-tag.

383 The sequence of a anti-Ldcl-Nb was cloned in the pHEN6 vector containing the pelB leader  
384 sequence from *Erwinia carotovora* for secretion into the periplasm, and a C-terminal 6xHis-tag  
385 (kindly provided by Dr. Aline Desmyte, AFMB Marseille).

386 Plasmids, primers and cloning strategy are summarised in Supplementary Table 4.

387

### 388 **Protein purification**

389 Ldcl-FP fusions and Ldcl mutants were expressed in BL21(DE3) cells grown in LB medium  
390 supplemented with 100 µg/mL ampicillin or 50 µg/mL kanamycin sulphate. Protein expression was  
391 induced using 40 µM IPTG (Euromedex EU008-C) and carried out overnight at 18°C. The Ldcl-FP  
392 fusions and Ldcl mutants were purified as previously described for wild-type Ldcl<sup>27,28,36</sup>, in a final  
393 buffer containing 25 mM Tris (pH 7.5), 0.3 M NaCl, 5% glycerol, 1 mM DTT and 0.1 mM PLP.

394 The anti-Ldcl-Nb was expressed in *E. coli* WK6 cells following the protocol described by<sup>52</sup>,  
395 and purified with immobilised metal affinity chromatography (IMAC, using a Ni-NTA column) followed  
396 by Size exclusion chromatography (SEC) using a a superdex 75 Increase 10/300GL column (GE-  
397 Healthcare, ref: 29-1487-21) equilibrated with a buffer containing 25 mM Tris pH 7.4 and 0.3 M NaCl.

398 In order to characterise the Ldcl complex with anti-Ldcl-Nb, the two proteins were mixed at  
399 a 1:5 molar ratio and submitted to size exclusion chromatography as carried out for Ldcl alone but  
400 without DTT in the buffer. The top of the peak was taken for subsequent ns-EM analysis.

401

### 402 **Ns-EM on Ldcl-FP fusions, Ldcl/anti-Ldcl-Nb and Ldcl mutants**

403 FP fusion samples after gel filtration were diluted to a concentration of approximately 0.025  
404 mg/mL. 3 µL was applied to the clean side of carbon on a carbon–mica interface and stained with  
405 2% uranyl acetate (mGeosM-Ldcl, Ldcl-mGeosM, Ldcl-Dendra2<sub>T69A</sub>, Ldcl/anti-Ldcl-Nb, Ldcl  
406 mutants) or 2% sodium silicotungstate (Dendra2<sub>T69A</sub>-Ldcl). Images were collected on a 120 kV  
407 Tecnai T12 microscope with an Orius 1000 camera (Gatan) or on a 200 kV Tecnai F20 electron  
408 microscope with either a OneView camera (Gatan) or a Ceta camera (Thermo Scientific). All images  
409 were collected with a defocus range of approximately -1.0 µm to -2.0 µm and with pixel sizes between  
410 2.29 Å/pixel and 3.42 Å/pixel.

411

### 412 **Image processing – Ldcl-FP and Ldcl/anti-Ldcl-Nb**

413 36 micrographs of Dendra2<sub>T69A</sub>-Ldcl with a pixel size of 2.73 Å/pixel, 368 micrographs of  
414 mGeosM-Ldcl with a pixel size of 2.29 Å/pixel, 23 micrographs of Ldcl-Dendra2<sub>T69A</sub>, 92 micrographs  
415 of Ldcl-mGeosM with a pixel size of 3.42 Å/pixel, and 124 micrographs of Ldcl/anti-Ldcl-Nb with a  
416 pixel size of 2.82 Å/pixel were used for image analysis.

417 CTF estimation was performed with CTFFIND3<sup>53</sup>. Semi-automatic particle selection was  
418 carried out with BOXER<sup>54</sup>, with box sizes of 98 x 98 pixels for Dendra2<sub>T69A</sub>-Ldcl, 180 x 180 pixels for

419 mGeosM-Ldcl, 128 x 128 pixels for Ldcl-Dendra2<sub>T69A</sub> and Ldcl-mGeosM, and 112 x 112 pixels for  
420 Ldcl/anti-Ldcl-Nb respectively. Particle extraction followed by several rounds of cleaning by 2D  
421 classification in RELION-1.4<sup>55</sup>, resulted in the following number of particles for each dataset:  
422 Dendra2<sub>T69A</sub>-Ldcl = 7140, mGeosM-Ldcl = 5514, Ldcl-Dendra2<sub>T69A</sub> = 832, Ldcl-mGeosM = 12,211  
423 and Ldcl/anti-Ldcl-Nb = 14,075.

424 For Dendra2<sub>T69A</sub>-Ldcl, initial model generation was carried out in RELION-2.1<sup>56</sup> without any  
425 symmetry applied. For mGeosM-Ldcl, initial model generation was carried out in RELION-2.1 with  
426 either C1, C3 or D3 symmetry applied. The results of all three calculations being very similar, the  
427 model with applied D3 symmetry was selected. For Ldcl-Dendra2<sub>T69A</sub>, Ldcl-mGeosM and Ldcl/anti-  
428 Ldcl-Nb, the previously-determined Ldcl decamer structure (PDB ID: 3N75) was filtered to 60 Å and  
429 used as an initial model for 3D refinement.

430 3D refinement was carried out for each dataset with applied C2 symmetry for Dendra2<sub>T69A</sub>-  
431 Ldcl, D3 symmetry for mGeosM-Ldcl, and D5 symmetry for Ldcl-Dendra2<sub>T69A</sub>, Ldcl-mGeosM and  
432 Ldcl/anti-Ldcl-Nb. Rigid body fitting of Ldcl (PDB ID: 3N75), mEos2 (PDB ID: 3S05) and Dendra2  
433 (PDB ID: 2VZX) crystal structures was then carried out in Chimera<sup>57</sup> for the five datasets.

434

### 435 **Cryo-EM on Ldcl stacks (pH 5.7)**

436 Wild-type Ldcl was purified as previously described<sup>10</sup> from an *E. coli* strain impaired in the  
437 production of ppGpp (MG1655  $\Delta$ relA $\Delta$ spoT) in order to avoid any serendipitous ppGpp binding.  
438 Purified Ldcl was diluted to a final concentration of approximately 0.25 mg/mL in a buffer containing  
439 25 mM MES (pH 5.7), 0.3 M NaCl, 5% glycerol, 1 mM DTT and 0.1 mM PLP. 3  $\mu$ L of the sample  
440 was applied to a glow-discharged R2/1 300 mesh holey carbon copper grid (Quantifoil Micro Tools  
441 GmbH) and plunge-frozen in liquid ethane using a Vitrobot Mark IV (FEI) operated at 100% humidity.  
442 Datasets were recorded at the European Synchrotron Radiation Facility (ESRF) in Grenoble,  
443 France<sup>58</sup>, on a Titan Krios microscope (Thermo Scientific) equipped with a BioQuantum LS/967  
444 energy filter (Gatan) and a K2 summit direct electron detector (Gatan) operated in counting mode. A  
445 total of 2564 movies of 30 frames were collected with a total exposure of 6 s, total dose of 29.3 e<sup>-</sup>/Å<sup>2</sup>  
446 and a slit width of 20 eV for the energy filter. All movies were collected at a magnification of 130,000x,  
447 corresponding to a pixel size of 1.052 Å/pixel at the specimen level. A summary of cryo-EM data  
448 collection parameters can be found in Supplementary Table 1.

449

### 450 **Image Processing – Ldcl stacks (pH 5.7)**

451 Motion correction and dose-weighting of the recorded movies were performed using  
452 MotionCor2<sup>59</sup>. CTF parameters were determined on the aligned and dose-weighted sums using  
453 CTFFIND4<sup>60</sup>. After manual inspection of the dose-weighted sums, the best 558 (21.7%) micrographs  
454 were selected for further processing. Ldcl stacks were manually picked using e2helixboxer in  
455 EMAN2<sup>61</sup>. A total of 15,165 Ldcl-stack particles were extracted in RELION-3.0<sup>62</sup> with an extract size  
456 of 320 pixels, resulting in boxes containing three Ldcl decamers, and with the --helix option with an  
457 outer diameter of 160 pixels and a helical rise of 77 pixels. After particle extraction, per-particle CTF  
458 correction was performed using Gctf<sup>63</sup>. Extracted particles were subjected to 2D classification in  
459 RELION-3.0, resulting in a cleaned dataset containing 15,157 particles. Initial 3D refinement with  
460 imposed D5 symmetry was carried out in RELION-3.0, using an initial model generated by manually

stacking three Ldcl decamers (PDB ID: 3N75) in Chimera<sup>57</sup> and low-pass filtering the resulting Ldcl stack to 40 Å. The resulting 4.3 Å resolution 3D reconstruction, along with the cleaned particle stack, was subsequently imported into CryoSPARC<sup>64</sup>. A final homogeneous 3D refinement in CryoSPARC, using a dynamic mask and imposing D5 symmetry, resulted in a map with a resolution of 3.28 Å based on the 0.143 gold-standard Fourier shell correlation (FSC) criterion<sup>65</sup>. The final map was sharpened using a B-factor of -96 Å<sup>2</sup>. A local resolution estimation of the final 3D reconstruction was calculated in RELION-3.0. A summary of cryo-EM data collection parameters and image processing steps for Ldcl stacks can be found in Supplementary Table 1 and Supplementary Figure 4, with local resolution and FSC curves shown in Supplementary Figure 5.

### **Cryo-EM on Ldcl decamers (pH 7.0)**

Purified Ldcl was dialysed into a buffer at pH 7.0 and diluted to a concentration of 0.25 mg/mL. 3 µL of diluted sample was applied to a glow-discharged (R2/1 300 mesh holey carbon copper grid (Quantifoil Micro Tools GmbH) and plunge-frozen in liquid ethane using a Vitrobot Mark IV (FEI) operated at 100% humidity. Images were recorded on a Glacios microscope (Thermo Scientific) equipped with a Falcon II direct electron detector (Thermo Scientific). A total of 2772 movies of 29 frames were collected with a total exposure of 1.5 s and a total dose of 45 e<sup>-</sup>/Å<sup>2</sup>. All movies were collected at a magnification of 116,086x, corresponding to a pixel size of 1.206 Å/pixel at the specimen level.

### **Image Processing – Ldcl decamers (pH 7.0)**

Motion correction was carried out using patch motion correction in CryoSPARC, discarding the first two frames. Initial CTF estimation was then carried out on summed frames using CTFFIND4. A subset of 600 micrographs were subjected to automatic picking using the blob picker in CryoSPARC, resulting in ~238,000 picked particles. Particles were then extracted with a box size of 256 x 256 and subjected to 2D classification. Particles from the best classes showing clear secondary structural features for Ldcl were selected for homogeneous refinement (with applied D5 symmetry) against EMD-3204 low-pass filtered to 30 Å, resulting in a reconstruction with a resolution of 4.2 Å (FSC = 0.143). This reconstruction was then used to create templates for picking the entire dataset using the template picker in CryoSPARC, after filtering to 12 Å. ~796,000 particles were extracted and subjected to 2D classification, and the best ~428,000 particles were subjected to heterogeneous refinement with applied D5 symmetry against the 4.2 Å map, resulting in one higher-resolution class corresponding to ~229,000 particles. These particles were subjected to homogeneous refinement with applied D5 symmetry, resulting in a map with a resolution of 2.76 Å (FSC = 0.143) which was then sharpened with a B-factor of -173 Å<sup>2</sup>. A summary of cryo-EM data collection parameters and image processing steps for Ldcl decamers can be found in Supplementary Table 1 and Supplementary Figure 4, with local resolution and FSC curves shown in Supplementary Figure 5.

### **Fitting of structures and refinement**

For fitting of atomic models in the 3D reconstructions of Ldcl at pH 5.7 (stack) or pH 7.0 (decamer), two (for the stack) or one copy (for the decamer) of the Ldcl X-ray crystal structure (PDB



503 ID: 3N75) were first rigid-body fitted in the corresponding 3D reconstructions using Chimera.  
504 Refinement was performed using the Phenix software package<sup>66</sup> and was identical for both 3D  
505 reconstructions. A first round of real space refinement was carried out with enabled rigid-body, global  
506 minimization, local grid search and ADP refinement parameters, and imposing rotamer,  
507 Ramachandran, NCS and reference model (PDB ID: 3N75) restraints. A final round of real space  
508 refinement was then performed using the same settings, but without rigid body refinement and  
509 without applying reference restrains, setting the 'nonbonded\_weight' parameter to 4000 and  
510 disabling 'local\_grid\_search'. A summary of refinement and model validation statistics can be found  
511 in Supplementary Table 1.

512

### 513 **pH shift experiment**

514 Stationary phase cultures, which were grown overnight from single colonies in LB medium,  
515 were diluted to OD<sub>600</sub> ~ 0.01 and re-grown at 37°C within approximately 1h 45 min in fresh LB  
516 medium to an OD<sub>600</sub> of 0.1. From this culture, 14 mL were transferred to 15 mL falcon tubes and  
517 pelleted by centrifugation at RT for 5 min. The supernatant was decanted, whereby systematically  
518 around 200 µL LB remained in the falcon tube. The pellet of bacteria was resuspended and  
519 afterwards, LB-4.6 containing 30 mM L-lysine was added to the cells up to 14 mL. To prepare LB-  
520 4.6 medium, LB powder (Sigma-Aldrich) was completely dissolved in distilled water by stirring for 30  
521 min. The pH of 4.6 was then adjusted using HCl. After autoclaving, sterile filtered L-lysine was added  
522 to LB-4.6. For this, L-lysine was dissolved in an aliquot of LB-4.6, sterile filtered and mixed with the  
523 remaining LB-4.6. 30 mM L-lysine were used. In order to grow the culture under oxygen-limiting  
524 conditions, the lid of the falcon tube was closed and the tubes were placed at 37°C on a shaker (150  
525 rpm). After defined time-points, aliquots were taken for OD<sub>600</sub> measurement, pH measurement,  
526 SDS-PAGE or immunofluorescence. For each time-point, a new tube was opened and not reused  
527 further.

528

### 529 **Western Blotting**

530 SDS-PAGE was performed with a Biorad electrophoresis chamber using standard 12% reducing  
531 SDS-PAGE gels. Proteins were transferred to a nitrocellulose membrane (Biorad) using a Trans-  
532 Blot Turbo Transfer System (Biorad). The membrane was blocked for 1h using 5% BSA in TBS  
533 supplemented with 0.1% Tween (TBS-T). Afterwards, the membrane was incubated for 1h with an  
534 anti-Ldcl antibody (Qalam-Antibodies) in BSA/TBS-T (1:5000). The membrane was subsequently  
535 washed 3 x 10 min in TBS-T and incubated for 1 h with HRP-coupled anti-rabbit antibody (1:10000  
536 in BSA/TBS-T). Finally the membrane was washed 3 x 10 min in TBS-T. The membrane was rinsed  
537 once with TBS, prior to detection of antibody-labelled proteins using ECL reagent (GE Healthcare).  
538 Incubation and detection of antibody was performed at 25 °C.

539

### 540 **Nanobody labelling**

541 For the labelling reaction, 50 µL nanobody (i.e. 200 µg) was pipetted into a 1.5 mL tube,  
542 placed on ice and supplemented with 5.5 µL of 1 M bicarbonate buffer at pH 8.3. 100 µg of Alexa-  
543 647 or Alexa-488 NHS ester dye (Life Technologies, A37573 and A20000) were dissolved in 10 µL  
544 DMSO to final concentration of 10 mg/mL. 5 µL (i.e. 40 nmol) dye in DMSO was added to the protein



545 and incubated for 1 h at room temperature in a shaking block, covered with an aluminium foil to  
546 protect the dye from the light. Excess dye was removed by iterative buffer exchange using a 3K spin  
547 column (Amicon-Ultra-4 Centrifugal Filters Ultracell 3K, Millipore UFC800396) to PBS. The degree  
548 of labelling was inferred from measuring the OD.

### 549 **Cell preparation for immunofluorescence staining of *E. coli* cells with nanobodies**

550 For immunofluorescence staining, the OD600 of the cell culture was measured, and the  
551 volume of cells corresponding to OD = 4, with OD = 1 corresponding to about  $8 \times 10^8$  cells per mL,  
552 were collected by centrifugation. After removal of LB by pipetting, cells were resuspended in 2 mL  
553 of 4 % FA in PBS (made from 16% Formaldehyde solution, Methanol-free from Thermo Scientific).  
554 Falcons were placed on a rotor for constant agitation for 45 min at room temperature. After fixation,  
555 cells were collected by centrifugation and the solution was removed by pipetting. Cells were then  
556 resuspended in 14 mL PBS (Gibco, Thermo Scientific) to remove and dilute the fixative. Cells were  
557 permeabilised for 10 min using 2 mL 0.1 % Triton X-100 in PBS and subsequently washed three  
558 times with 10 mL PBS. Finally, cells were transferred to 1.5 mL tubes, centrifuged and resuspended  
559 in 200  $\mu$ L 1% BSA/PBS (BSA/PBS solution was dissolved for 30 min and sterile-filtered to avoid  
560 clumps). After 30 min of incubation, 0.5  $\mu$ g anti-Ldcl-Nb, labelled with the dedicated dye, was added  
561 to the 200  $\mu$ L bacteria-BSA/PBS suspension. Cells were incubated with the labelled anti-Ldcl-Nb for  
562 16 h at 4°C. The next day, cells were washed three times with 1 mL PBS, centrifuged to remove  
563 antibody solution and resuspended in 250  $\mu$ L PBS. When needed, Hoechst 33342 (Sigma-Aldrich)  
564 was added to a final concentration of about 100 ng/mL.

### 565 **Wide-field imaging and flow cytometry**

566 For epifluorescence imaging, 2  $\mu$ L of cells were placed between a glass slide and a coverslip, which  
567 have been carefully pressed together, and observed using an inverted IX81 microscope, with a  
568 UPLFLN 100X oil immersion objective (N.A. 1.3) (Olympus), using the appropriate specific excitation  
569 and emission filters for AF488 (GFP-3035B set, Semrock) and DAPI (DAPI-5060B set, Semrock).  
570 Acquisitions were performed with Volocity software (QuorumTechnologies™) with a sCMOS  
571 2048x2048 camera (Hamamatsu ORCA Flash 4, 16 bits/pixel) achieving a final magnification of 64  
572 nm per pixel. For flow cytometry, 50  $\mu$ L of cells suspensions were injected in a MACSQuant VYB  
573 flow cytometer (Miltenyi Biotech, Bergish Gladbach, Germany) using the 488 nm excitation and  
574 525(50) nm emission channel (B1). AF488 positive populations were estimated after forward scatter  
575 (FSC) and side scatter (SSC) gating on the cells. Data were further processed with MACSQuantify  
576 software (Miltenyi Biotech).

### 577 **STORM imaging**

578 For Single Molecule Localization Microscopy, cells were transferred to a glucose buffer containing  
579 50 mM NaCl, 150 mM Tris (pH 8.0), 10% Glucose, 100 mM MEA (Mercaptoethylamine) and 1x Glox.  
580 Glox was prepared as a 10x stock and contained 1  $\mu$ M catalase and 2.3  $\mu$ M glucoseoxidase. Menzel  
581 glass slides (Thermo Scientific) and precision coverslips (1.5H from ThorLabs) were cleaned for 30  
582 min using an UV-ozone cleaning device (HELIOS□500, UVOTECH Systems). 2  $\mu$ L of immuno-  
583 labelled cells were placed onto a glass slide and covered with the coverslip, then cells were carefully  
584  
585  
586

587 spread by pressing glass slides firmly together and the sides were sealed with transparent nail polish  
588 to avoid evaporation. Mounted samples were imaged on a homemade SMLM set up based on an  
589 IX81 microscope (Olympus). STORM was performed by focusing a 643 nm excitation laser beam  
590 (Toptica Diode laser) to the back focal plane of an oil immersion UAPON100X (N.A. 1.49) objective.  
591 The intensity of the laser was tuned using an Acousto-Optical Tunable Filter (OATF, Quanta Tech).  
592 Acquisition was obtained with a 16 bits/pixel Evolve 512 EMCCD (Photometrics) using Metamorph  
593 (Molecular Devices), for a final pixel size of 123 nm. 3D-STORM based on point-spread-function  
594 astigmatism<sup>67</sup> was performed using a cylindrical lens (LJ1516L1-A, Thorlabs) placed in the detection  
595 light path. STORM datasets consisting of about 30,000 frames, using a 643 nm laser power density  
596 of 3 kW/cm<sup>2</sup> and a 405 nm laser power density of up to 1 W/cm<sup>2</sup> and a frametime of 50 ms, were  
597 acquired with an EMCCD gain set to 200. 3D point spread function calibration was achieved using  
598 tetraspec beads. Finally, data were processed with the Thunderstorm plugin<sup>68</sup> in ImageJ<sup>69</sup>. 3D-  
599 images were rendered with Visp<sup>70</sup> using a minimum neighbour density threshold of 20 to 28.

600

### 601 **Bilayer interferometry measurements**

602 For BLI binding studies, RavA with a biotinylated C-terminal AviTag was expressed and purified as  
603 previously described<sup>29</sup>. BLI experiments were performed in 1x HBS pH at 7.0 (25 mM HEPES, 300  
604 mM NaCl, 10 mM MgCl<sub>2</sub>, 10% glycerol) supplemented with 1x kinetics buffer (0.1% w/v BSA, 0.02%  
605 v/v Tween-20), 1mM ADP, 1mM DTT and 0.1 mM PLP. Experiments were performed using the BLItz  
606 System instrument (FortéBio), operated at room temperature. Before the start of each BLI  
607 experiment, RavA-AviTag was incubated with 1 mM ADP for 10 min. Streptavidin-coated biosensors  
608 (FortéBio) were functionalised with biotinylated RavA-AviTag, then quenched with 10 µg/mL biocytin.  
609 Experiments with the wild-type Ldcl are from<sup>29</sup>. For C-terminal Ldcl-FP fusions, pins were dipped in  
610 wells containing a range of Ldcl-FP concentrations from 0 to 1000 nM, with no binding signal  
611 recorded at any concentration of Ldcl-FP.

612

### 613 **Data and code availability**

614 Cryo-EM maps, along with the corresponding fitted atomic structures, have been submitted to the  
615 EMDB and PDB with accession codes EMD-10850 and PDB-6YN6 for Ldcl stacks (pH 5.7), and  
616 EMD-10849 and PDB-6YN5 for Ldcl decamers (pH 7.0).

617

### 618 **Acknowledgements**

619 We thank Guy Schoehn for establishing and managing the cryo-electron microscopy platform  
620 and for providing training and support, and Rose-Laure Revel-Goyet and Françoise Lacroix for the  
621 support and access to the M4D Cell imaging Platform. We are grateful to Aymeric Peuch for help  
622 with the usage of the EM computing cluster and Daniel Thédie, Kévin Floc'h and Joel Beaudoin for  
623 discussions. We thank Alain Roussel and Aline Desmyter for the nanobody production, and Julien  
624 Perard for help with the cloning of the Dendra2<sub>T69A</sub>-Ldcl construct. We acknowledge the European  
625 Synchrotron Radiation Facility for provision of beam time on CM01. This work was funded by the  
626 European Union's Horizon 2020 research and innovation programme under grant agreement No  
627 647784 to IG. The nanobody generation platform of the AFMB laboratory (Marseille, France) was  
628 supported by the French Infrastructure for Integrated Structural Biology (FRISBI) ANR-10-INSB-05-

629 01. For electron and fluorescence microscopy studies, this work used the platforms of the Grenoble  
630 Instruct centre (ISBG; UMS 3518 CNRS-CEA-UJF-EMBL) with support from FRISBI (ANR-10-INSB-  
631 05-02) and GRAL (ANR-10-LABX-49-01) within the Grenoble Partnership for Structural Biology  
632 (PSB). The electron microscope facility (Glacios electron microscope) is supported by the Rhône-  
633 Alpes Region (CIBLE and FEDER), the FRM, the CNRS, the University of Grenoble and the GIS-  
634 IBISA. JF was supported by a long-term EMBO fellowship (ALTF441-2017) and a Marie Skłodowska-  
635 Curie actions Individual Fellowship (789385, RespVIRALI).

636

### 637 **Author Contributions**

638 C.L., M.B., V.A., A.F. and K.H. cloned constructs, M.J., A.F. and K.H. purified proteins. M.J. and I.G.  
639 performed ns-EM imaging and analysis. A.D., G.E. and M.B.-V. performed cryo-EM imaging. J.F.  
640 and A.D. performed cryo-EM analysis. M.J. and J.F. built models resulting from EM maps. M.J., J.F.  
641 and I.G. analysed structures and interpreted data. C.L. and M.B. performed optical imaging of  
642 overexpression constructs with input of V.A., J.-P.K. and D.B. C.L. performed nanobody  
643 characterisation for optical imaging with input from J.-P.K. C.L. analysed endogenous expression  
644 and performed optical imaging of endogenous LdcI with input of V.A., J.-P.K. and D.B. C.L. and D.B.  
645 analysed STORM Images. M.J., C.L., J.F. and I.G. analysed the data and prepared the figures and  
646 tables. C.L. and D.B. contributed to the design of the optical imaging part of the project together with  
647 I.G. I.G. designed, supervised and funded the overall study. M.J., J.F. and I.G. wrote the manuscript  
648 with significant input from C.L. and contributions from all of the authors.

649

### 650 **References**

- 651 1. Prouteau, M. & Loewith, R. Regulation of Cellular Metabolism through Phase Separation of Enzymes.  
652 *Biomolecules* **8**, 160 (2018).
- 653 2. Fang, F. C., Frawley, E. R., Tapscott, T. & Vázquez-Torres, A. Bacterial Stress Responses during Host  
654 Infection. *Cell Host and Microbe* **20**, 133–143 (2016).
- 655 3. Watson, N., Duniak, D. S., Rosey, E. L., Slonczewski, J. L. & Olson, E. R. Identification of elements  
656 involved in transcriptional regulation of the Escherichia coli cad operon by external pH. *J. Bacteriol.*  
657 **174**, 530–540 (1992).
- 658 4. Foster, J. W. Escherichia coli acid resistance: Tales of an amateur acidophile. *Nature Reviews*  
659 *Microbiology* **2**, 898–907 (2004).
- 660 5. Moreau, P. L. The lysine decarboxylase CadA protects Escherichia coli starved of phosphate against  
661 fermentation acids. *J. Bacteriol.* **189**, 2249–2261 (2007).
- 662 6. Kanjee, U. *et al.* Linkage between the bacterial acid stress and stringent responses: The structure of  
663 the inducible lysine decarboxylase. *EMBO J.* **30**, 931–944 (2011).
- 664 7. Gale, E. F. The Bacterial Amino Acid Decarboxylases. *Adv. Enzymol. - Relat. Areas Mol. Biol.* **6**, 1–32  
665 (1946).
- 666 8. Sabo, D. L., Boeker, E. A., Byers, B., Waron, H. & Fischer, E. H. Purification and Physical Properties  
667 of Inducible Escherichia coli Lysine Decarboxylase. *Biochemistry* **13**, 662–670 (1974).
- 668 9. Gale, E. F. & Epps, H. M. R. The effect of the pH of the medium during growth on the enzymic activities  
669 of bacteria (Escherichia coli and Micrococcus lysodeikticus) and the biological significance of the  
670 changes produced. *Biochem. J.* **36**, 600–618 (1942).

- 671 10. Kandiah, E. *et al.* Structural insights into the Escherichia coli lysine decarboxylases and molecular  
672 determinants of interaction with the AAA+ ATPase RavA. *Sci. Rep.* **6**, (2016).
- 673 11. Surovtsev, I. V. & Jacobs-Wagner, C. Subcellular Organization: A Critical Feature of Bacterial Cell  
674 Replication. *Cell* **172**, 1271–1293 (2018).
- 675 12. Margolin, W. The price of tags in protein localization studies. *J. Bacteriol.* **194**, 6369–6371 (2012).
- 676 13. Gahlmann, A. & Moerner, W. E. Exploring bacterial cell biology with single-molecule tracking and super-  
677 resolution imaging. *Nature Reviews Microbiology* **12**, 9–22 (2014).
- 678 14. Landgraf, D., Okumus, B., Chien, P., Baker, T. A. & Paulsson, J. Segregation of molecules at cell  
679 division reveals native protein localization. *Nat. Methods* **9**, 480–482 (2012).
- 680 15. Costantini, L. M., Fossati, M., Francolini, M. & Snapp, E. L. Assessing the Tendency of Fluorescent  
681 Proteins to Oligomerize Under Physiologic Conditions. *Traffic* **13**, 643–649 (2012).
- 682 16. Ingerson-Mahar, M., Briegel, A., Werner, J. N., Jensen, G. J. & Gitai, Z. The metabolic enzyme CTP  
683 synthase forms cytoskeletal filaments. *Nat. Cell Biol.* **12**, 739–746 (2010).
- 684 17. Lynch, E. M. *et al.* Human CTP synthase filament structure reveals the active enzyme conformation.  
685 *Nat. Struct. Mol. Biol.* **24**, 507–514 (2017).
- 686 18. Frey, T. G., Eisenberg, D. & Eiserling, F. A. Glutamine synthetase forms three and seven stranded  
687 helical cables. *Proc. Natl. Acad. Sci. U. S. A.* **72**, 3402–3406 (1975).
- 688 19. Kim, G. *et al.* Aldehyde-alcohol dehydrogenase forms a high-order spiroosome architecture critical for  
689 its activity. *Nat. Commun.* **10**, (2019).
- 690 20. Schuchmann, K., Vonck, J. & Müller, V. A bacterial hydrogen-dependent CO<sub>2</sub> reductase forms  
691 filamentous structures. *FEBS J.* **283**, 1311–1322 (2016).
- 692 21. Yao, Z. & Carballido-López, R. Fluorescence Imaging for Bacterial Cell Biology: From Localization to  
693 Dynamics, From Ensembles to Single Molecules. *Annu. Rev. Microbiol.* **68**, 459–476 (2014).
- 694 22. Rust, M. J., Bates, M. & Zhuang, X. Sub-diffraction-limit imaging by stochastic optical reconstruction  
695 microscopy (STORM). *Nat. Methods* **3**, 793–795 (2006).
- 696 23. Betzig, E. *et al.* Imaging intracellular fluorescent proteins at nanometer resolution. *Science* **313**, 1642–  
697 5 (2006).
- 698 24. Hess, S. T., Girirajan, T. P. K. & Mason, M. D. Ultra-high resolution imaging by fluorescence  
699 photoactivation localization microscopy. *Biophys. J.* **91**, 4258–4272 (2006).
- 700 25. Chang, H. *et al.* A unique series of reversibly switchable fluorescent proteins with beneficial properties  
701 for various applications. *Proc. Natl. Acad. Sci.* **109**, 4455–4460 (2012).
- 702 26. Berardozzi, R., Adam, V., Martins, A. & Bourgeois, D. Arginine 66 Controls Dark-State Formation in  
703 Green-to-Red Photoconvertible Fluorescent Proteins. *J. Am. Chem. Soc.* **138**, 558–565 (2016).
- 704 27. Malet, H. *et al.* Assembly principles of a unique cage formed by hexameric and decameric E. coli  
705 proteins. *Elife* **3**, e03653 (2014).
- 706 28. Snider, J. *et al.* Formation of a distinctive complex between the inducible bacterial lysine decarboxylase  
707 and a novel AAA+ ATPase. *J. Biol. Chem.* **281**, 1532–1546 (2006).
- 708 29. Jessop, M. *et al.* Structural insights into ATP hydrolysis by the MoxR ATPase RavA and the LdcI-RavA  
709 cage-like complex. *Commun. Biol.* **3**, 46 (2020).
- 710 30. El Bakkouri, M. *et al.* Structure of RavA MoxR AAA+ protein reveals the design principles of a molecular  
711 cage modulating the inducible lysine decarboxylase activity. *Proc. Natl. Acad. Sci.* **107**, 22499–22504  
712 (2010).



- 713 31. Wong, K. S. *et al.* The MoxR ATPase RavA and its cofactor ViaA interact with the NADH: Ubiquinone  
714 oxidoreductase I in Escherichia coli. *PLoS One* **9**, e85529 (2014).
- 715 32. Wong, K. S., Bhandari, V., Janga, S. C. & Houry, W. A. The RavA-ViaA Chaperone-Like System  
716 Interacts with and Modulates the Activity of the Fumarate Reductase Respiratory Complex. *J. Mol. Biol.*  
717 **429**, 324–344 (2017).
- 718 33. Zhang, M. *et al.* Rational design of true monomeric and bright photoactivatable fluorescent proteins.  
719 *Nat. Methods* **9**, (2012).
- 720 34. Coltharp, C. & Xiao, J. Superresolution microscopy for microbiology. *Cell. Microbiol.* **14**, 1808–1818  
721 (2012).
- 722 35. Cramer, K. *et al.* Visualization of Bacterial Protein Complexes Labeled with Fluorescent Proteins and  
723 Nanobody Binders for STED Microscopy. *Int. J. Mol. Sci.* **20**, 3376 (2019).
- 724 36. Kanjee, U., Gutsche, I., Ramachandran, S. & Houry, W. A. The enzymatic activities of the escherichia  
725 coli basic aliphatic amino acid decarboxylases exhibit a pH zone of inhibition. *Biochemistry* **50**, 9388–  
726 9398 (2011).
- 727 37. Barák, I. & Muchová, K. The role of lipid domains in bacterial cell processes. *Int. J. Mol. Sci.* **14**, 4050–  
728 4065 (2013).
- 729 38. Lenn, T., Leake, M. C. & Mullineaux, C. W. Clustering and dynamics of cytochrome bd-I complexes in  
730 the Escherichia coli plasma membrane in vivo. *Mol. Microbiol.* **70**, 1397–1407 (2008).
- 731 39. Erhardt, H. *et al.* Organization of the Escherichia coli aerobic enzyme complexes of oxidative  
732 phosphorylation in dynamic domains within the cytoplasmic membrane. *Microbiologyopen* **3**, 316–326  
733 (2014).
- 734 40. Llorente-Garcia, I. *et al.* Single-molecule in vivo imaging of bacterial respiratory complexes indicates  
735 delocalized oxidative phosphorylation. *Biochim. Biophys. Acta - Bioenerg.* **1837**, 811–824 (2014).
- 736 41. Werner, J. N. *et al.* Quantitative genome-scale analysis of protein localization in an asymmetric  
737 bacterium. *Proc. Natl. Acad. Sci.* **106**, 7858–7863 (2009).
- 738 42. Magalon, A. & Alberge, F. Distribution and dynamics of OXPHOS complexes in the bacterial  
739 cytoplasmic membrane. *Biochimica et Biophysica Acta - Bioenergetics* **1857**, 198–213 (2016).
- 740 43. Bramkamp, M. & Lopez, D. Exploring the Existence of Lipid Rafts in Bacteria. *Microbiol. Mol. Biol. Rev.*  
741 **79**, 81–100 (2015).
- 742 44. Erhardt, H. *et al.* Disruption of individual nuo-genes leads to the formation of partially assembled  
743 NADH:ubiquinone oxidoreductase (complex I) in Escherichia coli. *Biochim. Biophys. Acta* **1817**, 863–  
744 71 (2012).
- 745 45. Yamamoto, Y., Miwa, Y., Miyoshi, K., Furuyama, J. I. & Ohmori, H. The Escherichia coli IdcC gene  
746 encodes another lysine decarboxylase, probably a constitutive enzyme. *Genes Genet. Syst.* **72**, 167–  
747 172 (1997).
- 748 46. Swilius, M. T. & Jensen, G. J. The helical mreB cytoskeleton in Escherichia coli MC1000/pLE7 is an  
749 artifact of the N-terminal yellow fluorescent protein tag. *J. Bacteriol.* **194**, 6382–6386 (2012).
- 750 47. Barák, I., Muchová, K., Wilkinson, A. J., O'Toole, P. J. & Pavlendová, N. Lipid spirals in Bacillus subtilis  
751 and their role in cell division. *Mol. Microbiol.* **68**, 1315–1327 (2008).
- 752 48. Mileykovskaya, E. & Dowhan, W. Cardiolipin membrane domains in prokaryotes and eukaryotes.  
753 *Biochimica et Biophysica Acta - Biomembranes* **1788**, 2084–2091 (2009).
- 754 49. Fishov, I. & Woldringh, C. L. Visualization of membrane domains in Escherichia coli. *Mol. Microbiol.* **32**,



- 755 1166–1172 (1999).
- 756 50. Daniel, R. A. & Errington, J. Control of cell morphogenesis in bacteria: Two distinct ways to make a  
757 rod-shaped cell. *Cell* **113**, 767–776 (2003).
- 758 51. Wang, S., Furchtgott, L., Huang, K. C. & Shaevitz, J. W. Helical insertion of peptidoglycan produces  
759 chiral ordering of the bacterial cell wall. *Proc. Natl. Acad. Sci. U. S. A.* **109**, (2012).
- 760 52. Pardon, E. *et al.* A general protocol for the generation of Nanobodies for structural biology. *Nat. Protoc.*  
761 **9**, 674–693 (2014).
- 762 53. Mindell, J. A. & Grigorieff, N. Accurate determination of local defocus and specimen tilt in electron  
763 microscopy. *J. Struct. Biol.* **142**, 334–347 (2003).
- 764 54. Ludtke, S. J., Baldwin, P. R. & Chiu, W. EMAN: Semiautomated Software for High-Resolution Single-  
765 Particle Reconstructions. *J. Struct. Biol.* **128**, 82–97 (1999).
- 766 55. Scheres, S. H. W. RELION: Implementation of a Bayesian approach to cryo-EM structure  
767 determination. *J. Struct. Biol.* **180**, 519–530 (2012).
- 768 56. Scheres, S. H. W. Processing of Structurally Heterogeneous Cryo-EM Data in RELION. in *Methods in*  
769 *Enzymology* **579**, 125–157 (2016).
- 770 57. Pettersen, E. F. *et al.* UCSF Chimera--a visualization system for exploratory research and analysis. *J.*  
771 *Comput. Chem.* **25**, 1605–12 (2004).
- 772 58. Kandiah, E. *et al.* CM01: A facility for cryo-electron microscopy at the European synchrotron. *Acta*  
773 *Crystallogr. Sect. D Struct. Biol.* **75**, (2019).
- 774 59. Zheng, S. Q. *et al.* MotionCor2: Anisotropic correction of beam-induced motion for improved cryo-  
775 electron microscopy. *Nature Methods* **14**, 331–332 (2017).
- 776 60. Rohou, A. & Grigorieff, N. CTFFIND4: Fast and accurate defocus estimation from electron micrographs.  
777 *J. Struct. Biol.* **192**, 216–221 (2015).
- 778 61. Tang, G. *et al.* EMAN2: An extensible image processing suite for electron microscopy. *J. Struct. Biol.*  
779 **157**, 38–46 (2007).
- 780 62. Zivanov, J. *et al.* New tools for automated high-resolution cryo-EM structure determination in RELION-  
781 3. *Elife* **7**, 1–22 (2018).
- 782 63. Zhang, K. Gctf: Real-time CTF determination and correction. *J. Struct. Biol.* **193**, 1–12 (2016).
- 783 64. Punjani, A., Rubinstein, J. L., Fleet, D. J. & Brubaker, M. A. CryoSPARC: Algorithms for rapid  
784 unsupervised cryo-EM structure determination. *Nat. Methods* **14**, 290–296 (2017).
- 785 65. Rosenthal, P. B. & Henderson, R. Optimal determination of particle orientation, absolute hand, and  
786 contrast loss in single-particle electron cryomicroscopy. *J. Mol. Biol.* **333**, 721–745 (2003).
- 787 66. Adams, P. D. *et al.* PHENIX: A comprehensive Python-based system for macromolecular structure  
788 solution. *Acta Crystallogr. Sect. D Biol. Crystallogr.* **66**, 213–221 (2010).
- 789 67. Huang, B., Wang, W., Bates, M. & Zhuang, X. Three-dimensional super-resolution imaging by  
790 stochastic optical reconstruction microscopy. *Science (80-. )*. **319**, (2008).
- 791 68. Ovesný, M., Křížek, P., Borkovec, J., Švindrych, Z. & Hagen, G. M. ThunderSTORM: A comprehensive  
792 ImageJ plug-in for PALM and STORM data analysis and super-resolution imaging. *Bioinformatics* **30**,  
793 (2014).
- 794 69. Schneider, C. A., Rasband, W. S. & Eliceiri, K. W. NIH Image to ImageJ: 25 years of image analysis.  
795 *Nature Methods* **9**, (2012).
- 796 70. El Beheiry, M. & Dahan, M. ViSP: Representing single-particle localizations in three dimensions. *Nature*

797  
798  
799

*Methods* **10**, (2013).

**Figure 1.**

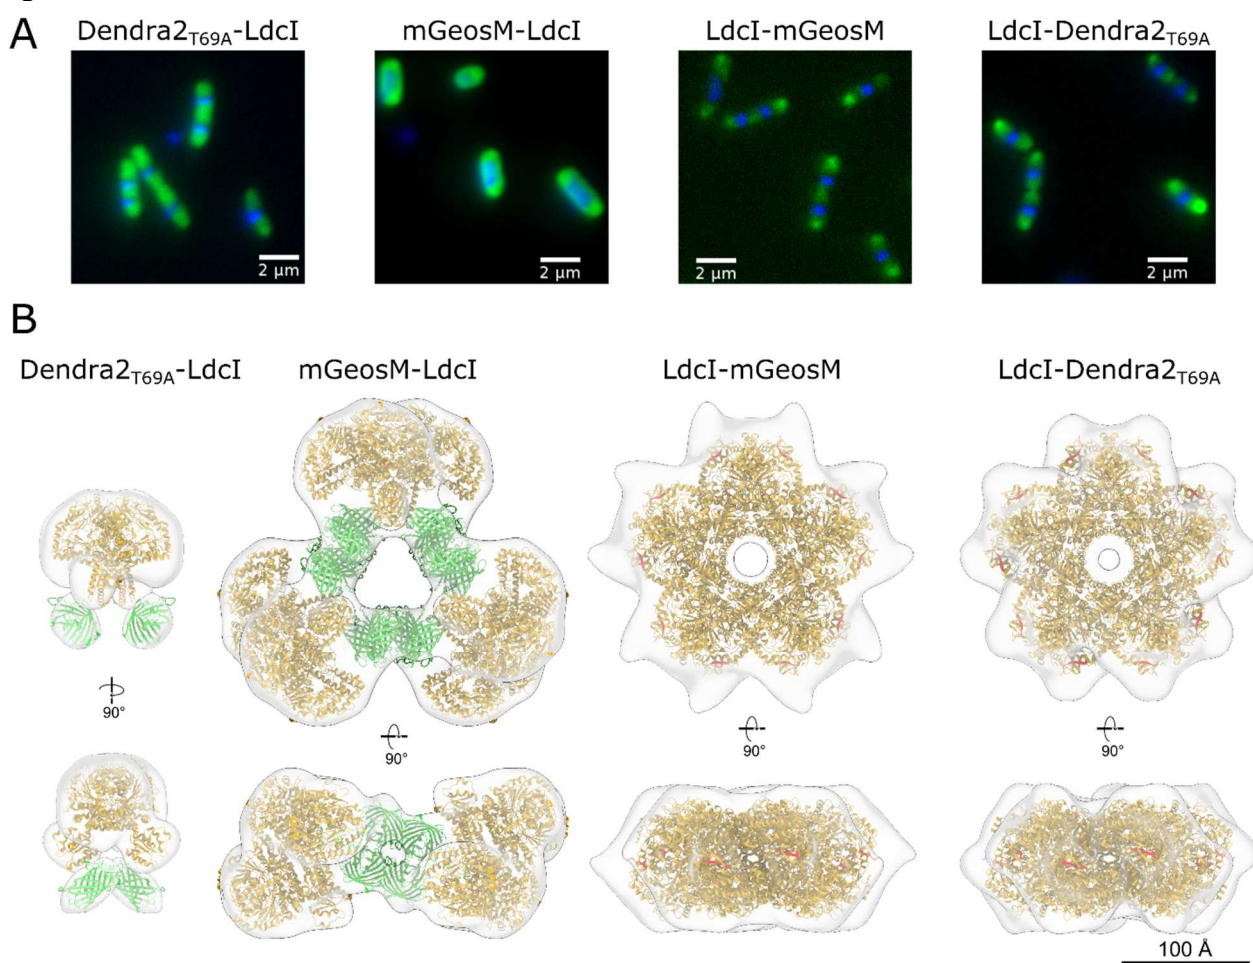

**Figure 1. Fluorescent protein fusions affect LdcI structure without significantly altering cellular localisation of overexpressed constructs. A)** Wide-field fluorescence microscopy images of *E. coli* cells overexpressing the fluorescent fusion proteins in A). Green fluorescence = FP-LdcI, blue fluorescence = DAPI-stained DNA. **B)** ns-EM 3D maps of fluorescently-tagged LdcI, with fitted models. Left – Dendra2<sub>T69A</sub>-LdcI forms dimers, with fluorescent barrels located next to the N-terminus of LdcI as expected. Second from left – mGeosM-LdcI forms large non-native oligomers, composed of three LdcI tetramers bridged by tetramers of mGeosM. Second from right and right – both C-terminal fluorescent fusions LdcI-mGeosM and LdcI-Dendra2<sub>T69A</sub> form decamers, with protrusions at the C-terminus (coloured in red) attributed to flexibly-linked fluorescent proteins. Fitted PBD models are as follows – LdcI: 3N75; Dendra2: 2VZX; mGeosM: 3S05 (mEos2 crystal structure).

**Figure 2.**

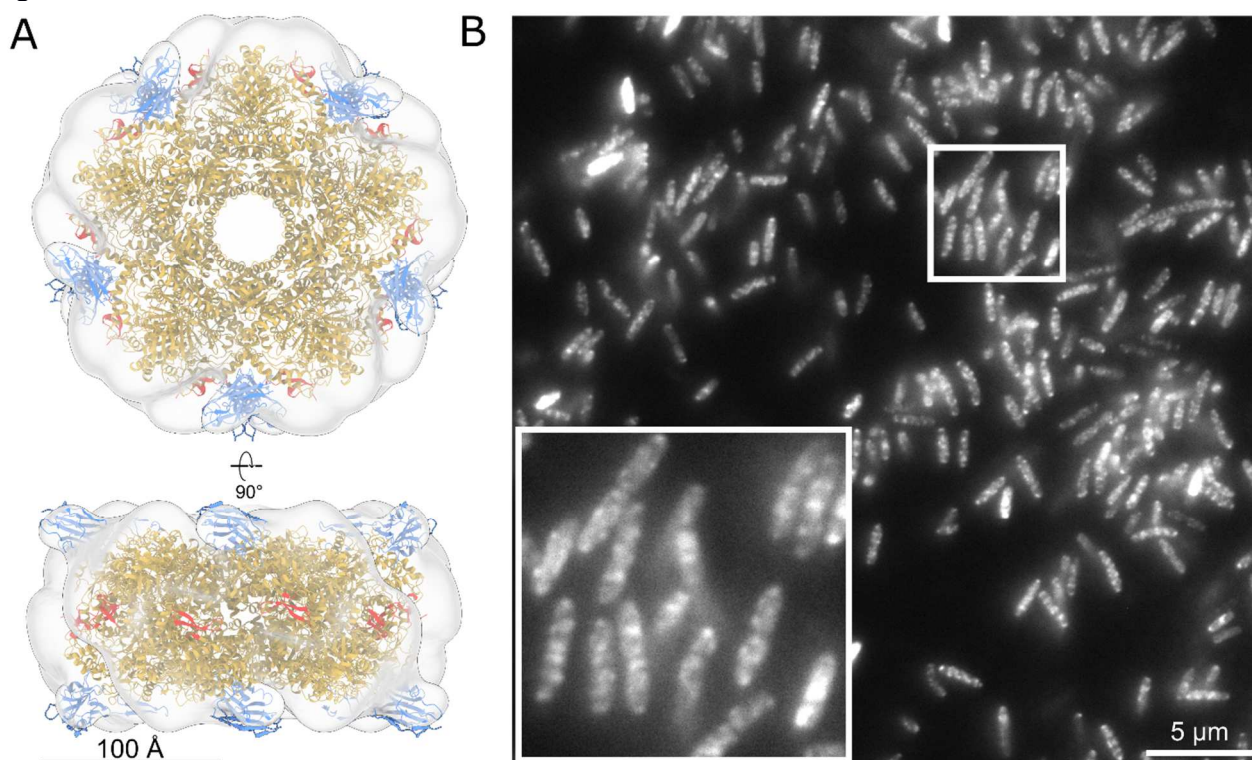

**Figure 2. Anti-Ldcl-Nb is a useful tool to probe cellular localisation of endogenous Ldcl under acid stress conditions.** **A)** Ns-EM 3D reconstruction of the Ldcl decorated by anti-Ldcl-Nb. An Ldcl decamer (gold, PDB ID: 3N75) and 10 nanobodies (blue, PDB ID: 1MEL, anti-lysozyme nanobody) are fitted in the density, with the nanobody binding at the top and bottom of the decameric ring. The C-terminal RavA binding site is indicated in red, and is in a spatially distinct location from the bound nanobodies. Scale bar = 100Å. **B)** Wide-field fluorescence microscopy image of wild-type *E. coli* MG1655 cells grown at pH 4.6 for 90 minutes stained with anti-Ldcl-Nb labelled with AF488. Inset – zoom of the image showing punctuate fluorescence patterns. Scale bar = 5 μm.

**Figure 3.**

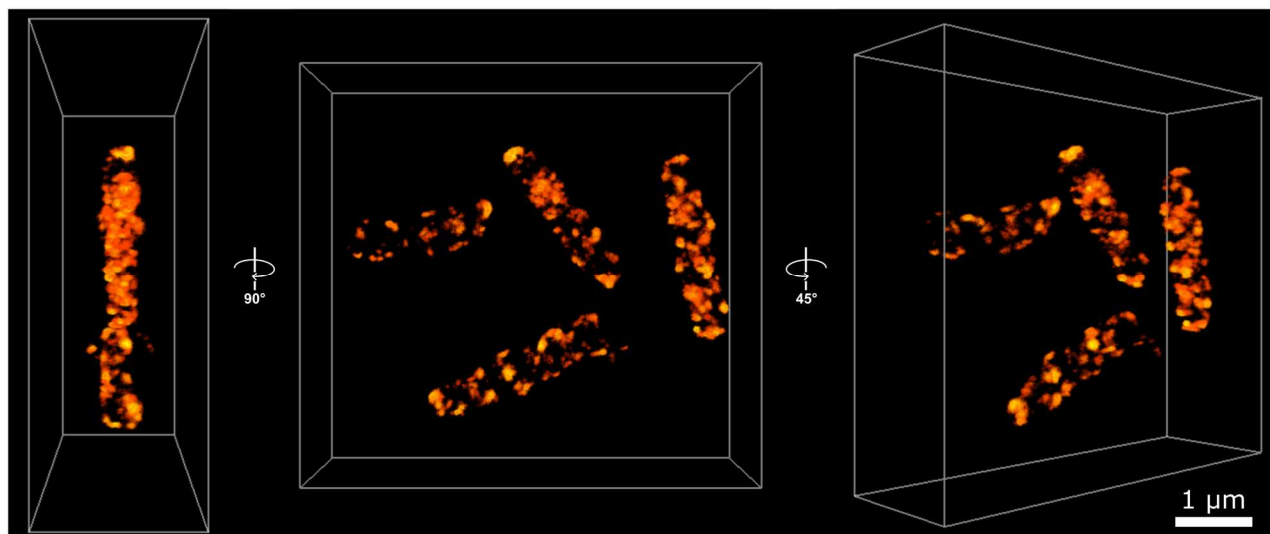

**Figure 3. 3D STORM imaging of *E. coli* cells stained with anti-Ldcl-Nb reveal a patchy pseudo-helically arranged distribution of endogenous Ldcl upon acid stress.** 3D-STORM imaging of wild-type Ldcl with AF647-conjugated anti-Ldcl-Nb. Points are coloured according to localisation density, with brighter points corresponding to higher localisation density. The centre panel shows four cells in the field of view, looking down the z-axis. Left and right panels show side and tilted views respectively. Scale bar = 1 nm.



**Figure 4.**

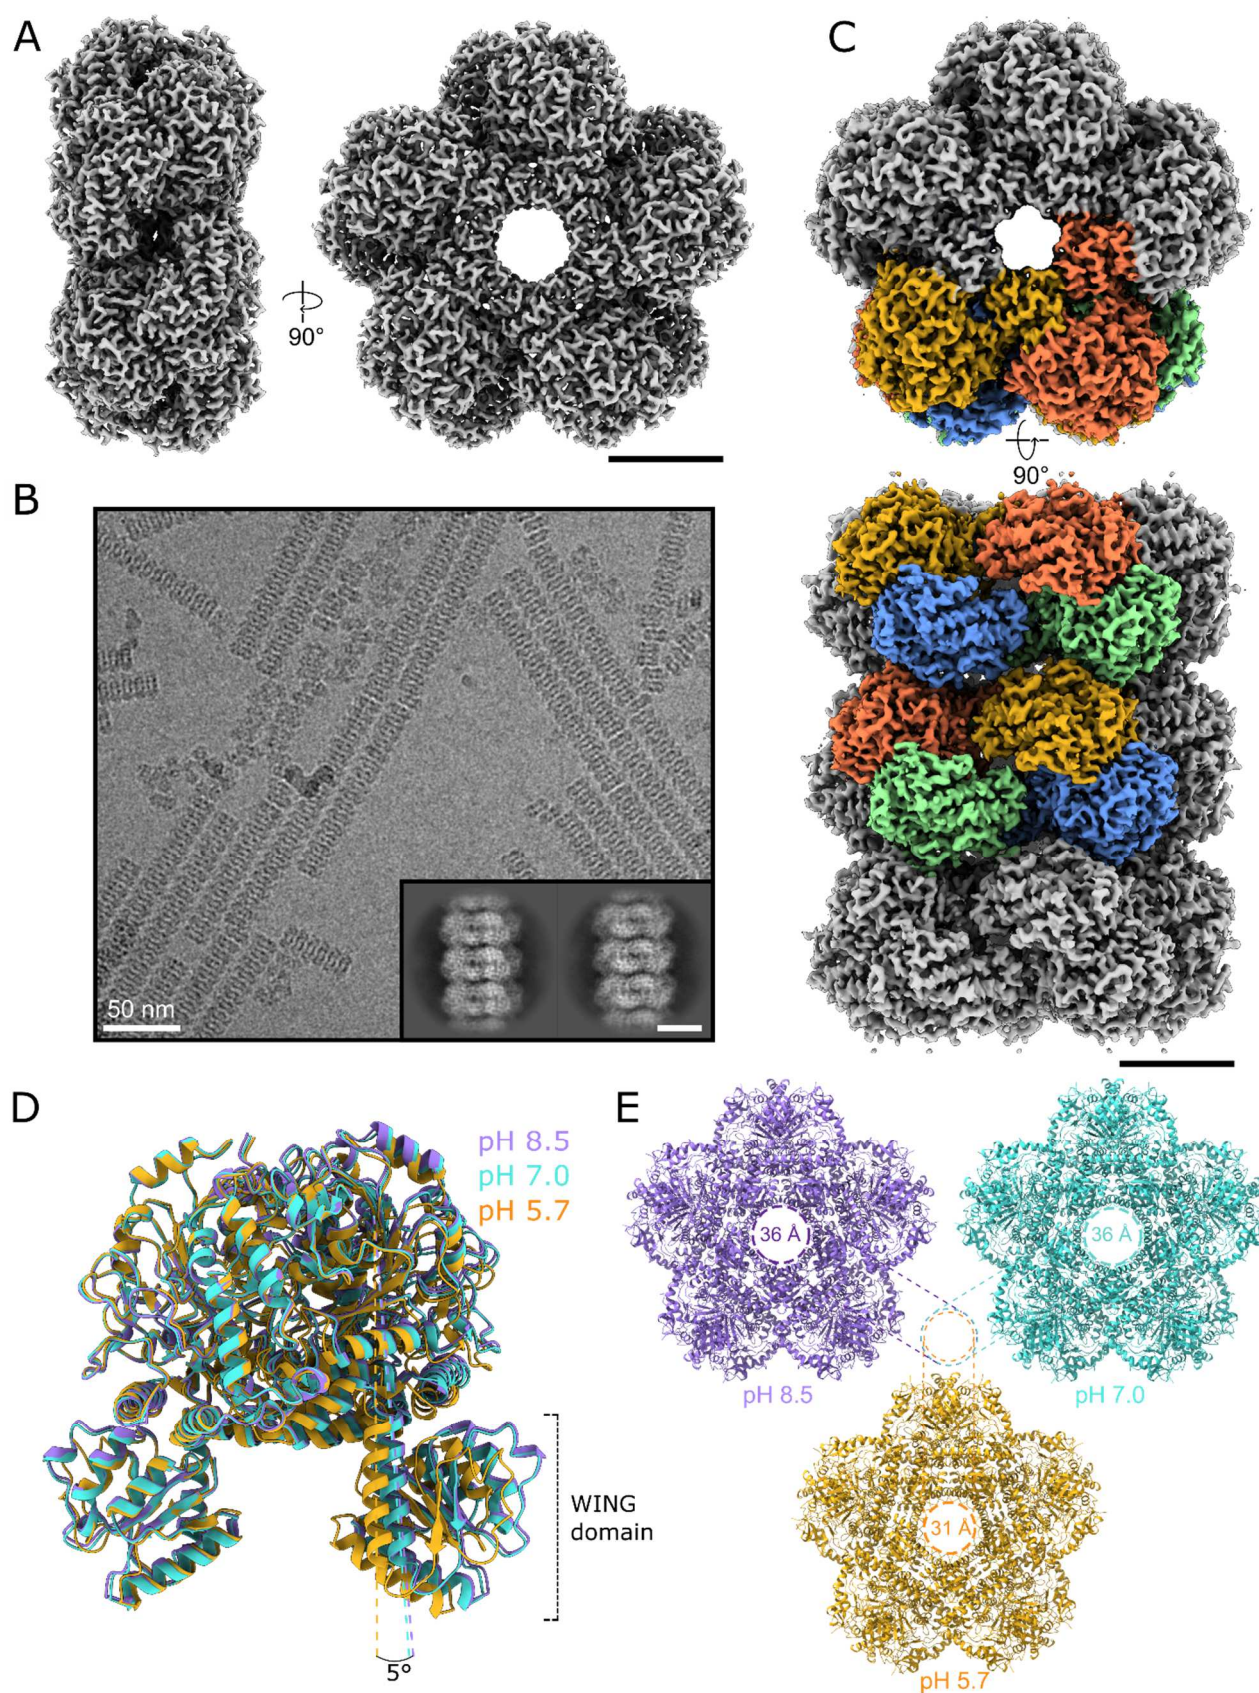

**Figure 4. Cryo-EM analysis of the Ldcl decamer at neutral pH and Ldcl stacks formed in acid stress conditions. A)** Cryo-EM reconstruction of the Ldcl decamer at pH 7.0 from side (left) and top (right) views. Scale bar = 50 Å. **B)** Cryo-EM micrograph of Ldcl stacks, scale bar = 100 nm. Inset – 2D class averages displaying clear secondary structural features, scale bar = 100 Å. **C)** Top (above) and side (below) views of the cryo-EM reconstruction of a three-decamer Ldcl stack. Four dimers

are coloured either blue/gold or green/coral, corresponding to the colouring of the atomic model presented in Figure 5. Scale bar = 50 Å. **D)** Overlay of Ldcl dimers at pH 8.5 (PDB ID: 3N75, shown in lilac), 7.0 (shown in cyan) and 5.7 (shown in gold). Alignment was carried out on a single monomer in the dimer pair. There is a 5° shift in the angle between the wing domains of Ldcl at pH 5.7 and pH 7.0/8.5. **E)** Comparison of the central decamer pore diameter between Ldcl at pH 8.5, 7.0 and 5.7, showing a 5 Å decrease in the pore size upon stack formation at low pH.



**Figure 5.**

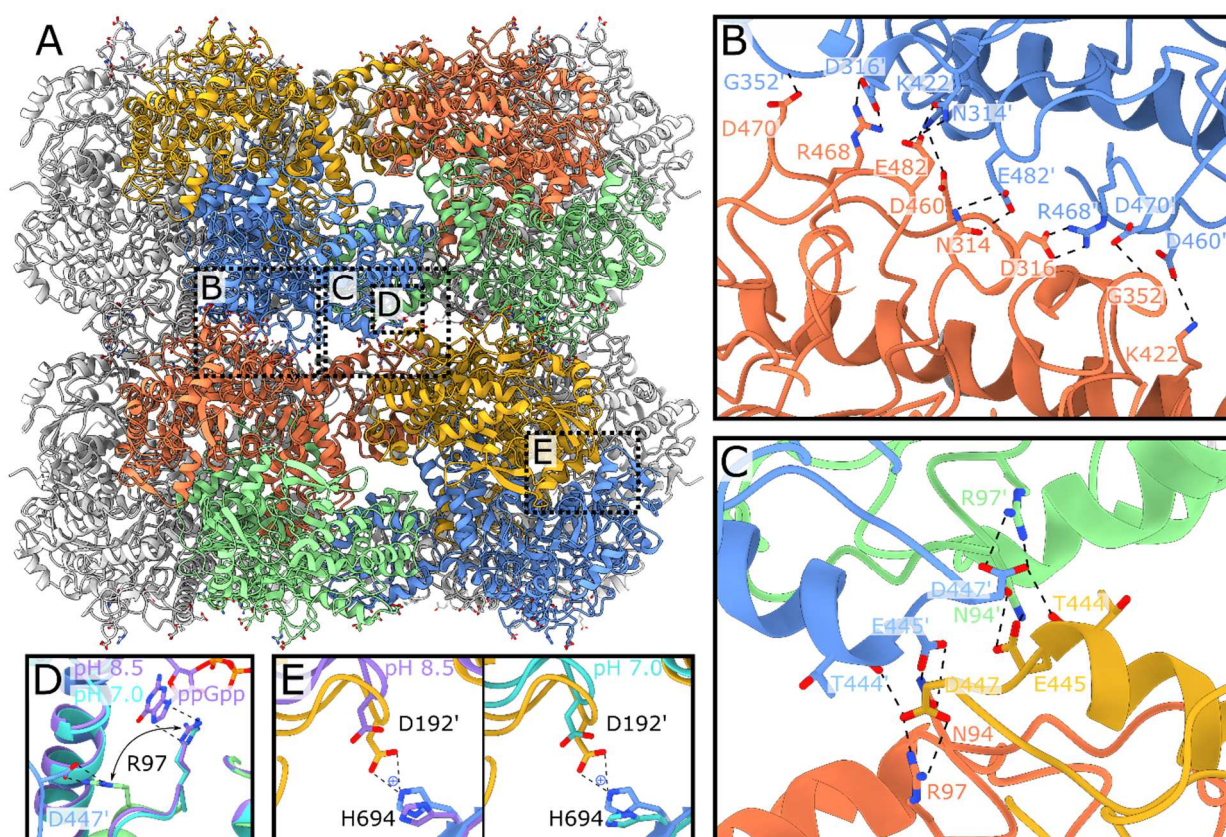

**Figure 5. Structural insights into molecular determinants of the Ldcl polymerisation under acid stress conditions.** **A)** Atomic model of a two-decamer Ldcl stack at pH 5.7. Dimers are coloured as shown in the cryo-EM map in Figure 4. Dotted boxes on the two-decamer stack indicate the locations of the zooms shown in panels B-E. **B)** Close-up of the first decamer-decamer interface, which includes the key stack-forming residue R468. **C)** Close-up of the second decamer-decamer interface. **D)** Overlay of the Ldcl decamer structures at pH 8.5 and 7.0 with the Ldcl stack structure at pH 5.7, focussed on R97. R97 in the Ldcl stack (green) adopts a different conformation compared to the one in the pH 8.5 crystal structure (purple, with ppGpp bound) and the pH 7.0 cryo-EM map (cyan, without ppGpp bound). Despite the absence of ppGpp in the pH 7.0 sample, R97 is still oriented towards the ppGpp binding site. **E)** Comparison between the H694-D192' distance in the Ldcl stack at pH 5.7 (coloured gold and blue), the Ldcl decamer at pH 8.5 (left, coloured purple) and pH 7.0 (right, coloured cyan). Key residues are labelled for all panels, and interactions are shown with dotted lines.

**Figure 6.**

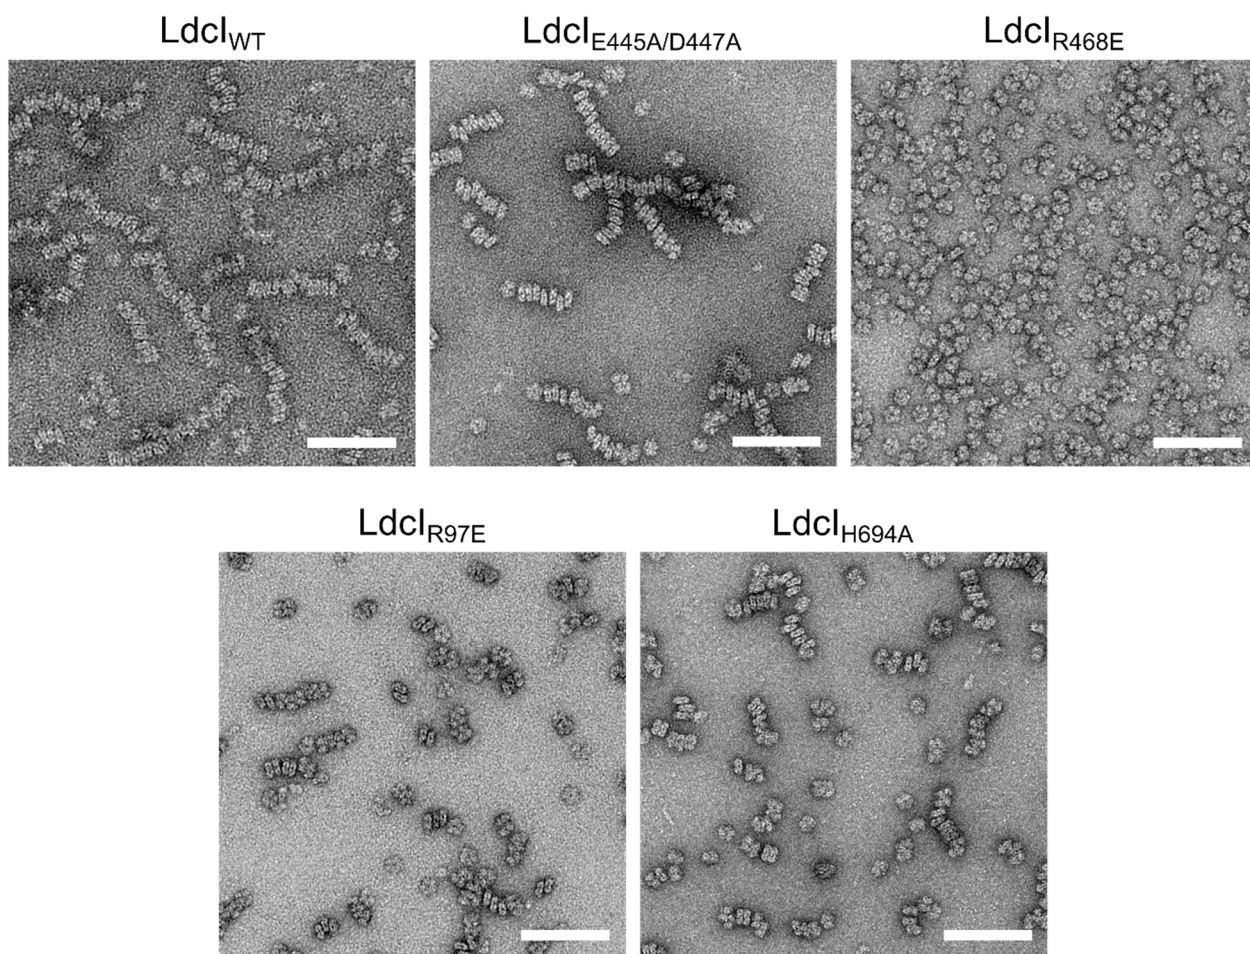

**Figure 6. Mutational analysis of the predicted molecular determinants of the Ldcl polymerisation under acid stress conditions** Cropped negative stain EM micrographs of wild-type and mutant Ldcl at pH 5.7, scale bar = 100 nm. Ldcl<sub>WT</sub> polymerises at pH 5.7, as does the double mutant Ldcl<sub>E445A/D447A</sub>. In contrast, the single mutation R468E abolishes stack formation completely. Both Ldcl<sub>R97E</sub> and Ldcl<sub>H694A</sub> are able to polymerise, however the stacks tend to be shorter than for Ldcl<sub>WT</sub>. Micrographs for Ldcl<sub>R97E/R468E</sub>, Ldcl<sub>E445A/D447A/R468E</sub>, and Ldcl<sub>H694N</sub> were also collected but are not shown here. Ldcl<sub>E445A/D447A/R468E</sub> and Ldcl<sub>R97E/R468E</sub> behaved like Ldcl<sub>R468E</sub> and remained entirely decameric at low pH, while Ldcl<sub>H694N</sub> displayed similar behaviour to Ldcl<sub>H694A</sub>.
